# Supplementary material for: Parental Hesitancy towards the Established Childhood Vaccination Programmes in the COVID-19 Era: Assessing the Drivers of a Challenging Public Health Concern
Source: MDPI journal article supplement (doi:10.3390/vaccines10050814), 2022-05-20
Supplement: s1 [file s1]

**Table S2:** Odds ratios (OR) and 95% confidence intervals (CI) for the association between considerations about COVID-19 and childhood vaccine hesitancy, using post code as a cluster variable.

|                                                                                          | Minimally adjusted model <sup>1</sup> |                        | Maximally adjusted model <sup>2</sup> |                        |
|------------------------------------------------------------------------------------------|---------------------------------------|------------------------|---------------------------------------|------------------------|
|                                                                                          | OR (95% CI)                           | p-value                | OR (95% CI)                           | p-value                |
| <b>Coronavirus existence</b>                                                             |                                       |                        |                                       |                        |
| Definitely not/probably not/do not know                                                  | Ref                                   |                        | Ref                                   |                        |
| Probably yes                                                                             | 0.21 (0.11, 0.42)                     |                        | 0.20 (0.06, 0.64)                     |                        |
| Definitely yes                                                                           | 0.05 (0.04, 0.07)                     | 1.3×10 <sup>-115</sup> | 0.05 (0.03, 0.09)                     | 4.0×10 <sup>-59</sup>  |
| <b>Knowledge about COVID-19</b>                                                          |                                       |                        |                                       |                        |
| Poor knowledge                                                                           | Ref                                   |                        | Ref                                   |                        |
| Moderate knowledge                                                                       | 0.64 (0.40, 1.02)                     |                        | 0.48 (0.32, 0.72)                     |                        |
| Good knowledge                                                                           | 0.45 (0.34, 0.59)                     | 7.1×10 <sup>-09</sup>  | 0.49 (0.27, 0.89)                     | 1.8×10 <sup>-04</sup>  |
| <b>Following COVID-19 measures of personal protection <sup>3, 4</sup></b>                |                                       |                        |                                       |                        |
| Never/rarely/sometimes                                                                   | Ref                                   |                        | Ref                                   |                        |
| Frequently                                                                               | 0.22 (0.09, 0.55)                     |                        | 0.33 (0.08, 1.44)                     |                        |
| Almost always/always                                                                     | 0.06 (0.04, 0.08)                     | 1.4×10 <sup>-92</sup>  | 0.09 (0.05, 0.15)                     | 5.8×10 <sup>-108</sup> |
| <b>Following COVID-19 measures of public protection <sup>3, 5</sup></b>                  |                                       |                        |                                       |                        |
| Never/rarely/sometimes                                                                   | Ref                                   |                        | Ref                                   |                        |
| Frequently                                                                               | 0.22 (0.10, 0.49)                     |                        | 0.23 (0.06, 0.94)                     |                        |
| Almost always/always                                                                     | 0.06 (0.03, 0.09)                     | 3.4×10 <sup>-41</sup>  | 0.06 (0.02, 0.16)                     | 2.5×10 <sup>-29</sup>  |
| <b>Trust to health authorities for minimizing the spread of coronavirus <sup>3</sup></b> |                                       |                        |                                       |                        |
| No trust                                                                                 | Ref                                   |                        | Ref                                   |                        |
| Little trust                                                                             | 0.28 (0.10, 0.80)                     |                        | 0.26 (0.11, 0.62)                     |                        |
| Some trust                                                                               | 0.14 (0.08, 0.24)                     |                        | 0.12 (0.05, 0.27)                     |                        |
| Absolute trust                                                                           | 0.05 (0.02, 0.15)                     | 3.8×10 <sup>-17</sup>  | 0.04 (0.00, 0.41)                     | 1.2×10 <sup>-09</sup>  |
| <b>Trust to official information for the new pandemic <sup>3</sup></b>                   |                                       |                        |                                       |                        |
| No trust                                                                                 | Ref                                   |                        | Ref                                   |                        |
| Little trust                                                                             | 0.31 (0.18, 0.51)                     |                        | 0.48 (0.29, 0.79)                     |                        |
| Some/absolute trust                                                                      | 0.11 (0.04, 0.29)                     | 2.5×10 <sup>-07</sup>  | 0.08 (0.02, 0.34)                     | 9.8×10 <sup>-05</sup>  |
| <b>Trust to Government for minimizing the spread of coronavirus <sup>3</sup></b>         |                                       |                        |                                       |                        |
| No trust                                                                                 | Ref                                   |                        | Ref                                   |                        |

|                                                                                 |                   |                       |                   |                       |
|---------------------------------------------------------------------------------|-------------------|-----------------------|-------------------|-----------------------|
| Little trust                                                                    | 0.32 (0.11, 0.92) |                       | 0.47 (0.13, 1.65) |                       |
| Some trust                                                                      | 0.21 (0.08, 0.59) |                       | 0.18 (0.03, 1.03) |                       |
| Absolute trust                                                                  | 0.08 (0.02, 0.32) | 6.6×10 <sup>-12</sup> | 0.05 (0.01, 0.18) | 8.1×10 <sup>-16</sup> |
| <b>Seasonal flu vaccination this year</b> <sup>3</sup>                          |                   |                       |                   |                       |
| No                                                                              | Ref               |                       | Ref               |                       |
| Yes                                                                             | 0.08 (0.04, 0.19) | 4.9×10 <sup>-09</sup> | 0.08 (0.01, 0.39) | 0.002                 |
| <b>Seasonal flu vaccination last year</b> <sup>3</sup>                          |                   |                       |                   |                       |
| No                                                                              | Ref               |                       | Ref               |                       |
| Yes                                                                             | 0.18 (0.09, 0.37) | 3.7×10 <sup>-06</sup> | 0.18 (0.05, 0.67) | 0.011                 |
| <b>Capability to protect against coronavirus</b> <sup>3</sup>                   |                   |                       |                   |                       |
| No/little capability                                                            | Ref               |                       | Ref               |                       |
| Moderate capability                                                             | 1.39 (0.76, 2.54) |                       | 1.21 (0.91, 1.60) |                       |
| Absolute capability                                                             | 2.84 (0.93, 8.69) | 0.185 *               | 1.79 (0.65, 4.97) | 0.300 *               |
| <b>COVID-19 symptoms during last months</b> <sup>3, 6</sup>                     |                   |                       |                   |                       |
| No                                                                              | Ref               |                       | Ref               |                       |
| Yes                                                                             | 1.84 (1.06, 3.19) | 0.029                 | 0.82 (0.09, 7.90) | 0.867 *               |
| <b>COVID-19 tested</b> <sup>3</sup>                                             |                   |                       |                   |                       |
| No                                                                              | Ref               |                       | Ref               |                       |
| Yes                                                                             | 0.75 (0.47, 1.19) | 0.218 *               | 1.12 (0.61, 2.04) | 0.721 *               |
| <b>Family member with COVID-19 diagnosis</b> <sup>3</sup>                       |                   |                       |                   |                       |
| No                                                                              | Ref               |                       | Ref               |                       |
| Yes                                                                             | 0.69 (0.27, 1.75) | 0.432 *               | 0.76 (0.09, 6.76) | 0.806 *               |
| <b>Willingness to vaccinate against coronavirus</b> <sup>3</sup>                |                   |                       |                   |                       |
| No                                                                              | Ref               |                       |                   |                       |
| Yes                                                                             | 0.01 (0.00, 0.02) | 2.5×10 <sup>-11</sup> | ‡                 |                       |
| <b>Willingness to vaccinate their children against coronavirus</b> <sup>3</sup> |                   |                       |                   |                       |
| No                                                                              | Ref               |                       | Ref               |                       |
| Yes                                                                             | 0.02 (0.01, 0.03) | 1.6×10 <sup>-48</sup> | 0.02 (0.00, 0.10) | 1.4×10 <sup>-05</sup> |

**Abbreviations:** COVID-19, coronavirus disease 2019; Ref, reference category

<sup>1</sup> Model adjusted for age, sex, education, and income

<sup>2</sup> Model adjusted for age, sex, education, income, depression, physical activity measured using total metabolic equivalents, profession, health status, smoking status and body mass index

<sup>3</sup> The responses “Do not know/Do not answer” were not taken into account

<sup>4</sup> COVID-19 measures of personal protection: mask use, frequent hand washing, keeping distance

<sup>5</sup> COVID-19 measures of public protection: mask use, covering the nose/mouth when coughing or sneezing, avoiding large concentrations, staying home or informing the authorities when not feeling well

<sup>6</sup> Fever, persistent cough, breathing difficulty, loss of smell/taste

\* p-value not statistically significant after FDR correction for multiple comparisons.

‡ Model could not run because the variable predicted failures perfectly
