# Supplementary material for: Parental Hesitancy towards the Established Childhood Vaccination Programmes in the COVID-19 Era: Assessing the Drivers of a Challenging Public Health Concern
Source: MDPI journal article supplement (doi:10.3390/vaccines10050814), 2022-05-20
Supplement: s1 [file s1]

**Table S1:** Socio-demographic, lifestyle and health-related characteristics of participants and COVID-19 related variables, according to sex.

|                                                                                | Men<br>N=380 (34.7%) | Women<br>N=715 (65.3%) | p-value               |
|--------------------------------------------------------------------------------|----------------------|------------------------|-----------------------|
| <b>Childhood vaccine hesitancy</b>                                             | 34 (8.9)             | 64 (9.0)               | >0.99                 |
| <b>Age (years), mean (SD)</b>                                                  | 51.53 (9.23)         | 49.57 (9.37)           | 0.001                 |
| <b>BMI (kg/m<sup>2</sup>), mean (SD) <sup>1</sup></b>                          | 27.75 (4.30)         | 25.46 (4.66)           | 1.6×10 <sup>-14</sup> |
| <b>Total METs [kcal/(kg×h)], mean (SD) <sup>2</sup></b>                        | 25.74 (36.81)        | 19.03 (24.94)          | 0.001                 |
| <b>Marital status, N (%)</b>                                                   |                      |                        |                       |
| Unmarried/divorced/widowed                                                     | 41 (10.9)            | 114 (16.1)             | 0.020                 |
| Married/in cohabitation agreement                                              | 335 (89.1)           | 593 (83.9)             |                       |
| <b>Education, N (%)</b>                                                        |                      |                        |                       |
| Up to high school                                                              | 100 (26.4)           | 178 (25.0)             | 0.720                 |
| University degree                                                              | 153 (40.4)           | 305 (42.9)             |                       |
| Master's degree or higher                                                      | 126 (33.2)           | 228 (32.1)             |                       |
| <b>Profession, N (%)</b>                                                       |                      |                        |                       |
| Executive/scientist/artist/office                                              | 238 (66.5)           | 531 (81.4)             | 1.3×10 <sup>-13</sup> |
| Providing services/seller                                                      | 29 (8.1)             | 70 (10.7)              |                       |
| Manual labour                                                                  | 91 (25.4)            | 51 (7.8)               |                       |
| <b>Income (Euros/month), N (%)</b>                                             |                      |                        |                       |
| ≤900                                                                           | 70 (19.8)            | 200 (31.4)             | 5.5×10 <sup>-11</sup> |
| 901-1100                                                                       | 52 (14.7)            | 125 (19.7)             |                       |
| 1101-1400                                                                      | 97 (27.5)            | 196 (30.8)             |                       |
| >1400                                                                          | 134 (38.0)           | 115 (18.1)             |                       |
| <b>Smoking status, N (%)</b>                                                   |                      |                        |                       |
| Non-smokers                                                                    | 122 (32.2)           | 292 (41.0)             | 1.2×10 <sup>-05</sup> |
| Former smokers                                                                 | 120 (31.7)           | 136 (19.1)             |                       |
| Current smokers                                                                | 137 (36.1)           | 284 (39.9)             |                       |
| <b>Alcohol consumption, N (%)</b>                                              |                      |                        |                       |
| Never                                                                          | 24 (6.3)             | 148 (20.8)             | 1.4×10 <sup>-13</sup> |
| Less than once/month                                                           | 94 (24.7)            | 224 (31.5)             |                       |
| 1-3 times/month                                                                | 103 (27.1)           | 150 (21.1)             |                       |
| 1-2 times/week                                                                 | 95 (25.0)            | 139 (19.5)             |                       |
| 3 or more times/week                                                           | 64 (16.8)            | 51 (7.2)               |                       |
| <b>Weight change during last 6 months, N (%)</b>                               |                      |                        |                       |
| No change                                                                      | 224 (58.9)           | 350 (49.4)             | 0.004                 |
| Lost weight                                                                    | 67 (17.6)            | 129 (18.2)             |                       |
| Gained weight                                                                  | 89 (23.4)            | 229 (32.3)             |                       |
| <b>Health status, N (%)</b>                                                    |                      |                        |                       |
| Moderate/bad/very bad                                                          | 44 (11.6)            | 108 (15.1)             | 0.122                 |
| Good                                                                           | 213 (56.3)           | 360 (50.5)             |                       |
| Very good                                                                      | 121 (32.0)           | 245 (34.4)             |                       |
| <b>Restriction of activities during last year due to a health issue, N (%)</b> |                      |                        |                       |
| None                                                                           | 243 (64.1)           | 379 (53.9)             | 0.001                 |
| A little/moderately                                                            | 94 (24.8)            | 197 (28.0)             |                       |
| Much/very much                                                                 | 42 (11.1)            | 127 (18.1)             |                       |
| <b>Stress during last 2 weeks, N (%)</b>                                       |                      |                        |                       |
| No days                                                                        | 98 (25.8)            | 94 (13.1)              | 1.7×10 <sup>-06</sup> |
| Some days                                                                      | 199 (52.4)           | 408 (57.1)             |                       |
| More than half days                                                            | 42 (11.1)            | 102 (14.3)             |                       |
| Almost every day                                                               | 41 (10.8)            | 111 (15.5)             |                       |
| <b>Depression during last 2 weeks, N (%)</b>                                   |                      |                        |                       |
| No days                                                                        | 172 (45.3)           | 202 (28.3)             | 3.8×10 <sup>-07</sup> |
| Some days                                                                      | 147 (38.7)           | 369 (51.6)             |                       |
| More than half days                                                            | 39 (10.3)            | 83 (11.6)              |                       |
| Almost every day                                                               | 22 (5.8)             | 61 (8.5)               |                       |
| <b>Chronic disease, N (%)</b>                                                  | 133 (35.8)           | 259 (36.8)             | 0.748                 |
| <b>Diabetes diagnosis, N (%)</b>                                               | 29 (7.7)             | 50 (7.0)               | 0.689                 |
| <b>High cholesterol diagnosis, N (%)</b>                                       | 155 (41.0)           | 262 (36.8)             | 0.174                 |

|                                                                                                 |            |            |                       |
|-------------------------------------------------------------------------------------------------|------------|------------|-----------------------|
| <b>High blood pressure diagnosis, N (%)</b>                                                     | 104 (27.6) | 133 (18.6) | 0.001                 |
| <b>Area of residence, N (%)</b>                                                                 |            |            |                       |
| Attica                                                                                          | 70 (18.5)  | 140 (19.7) |                       |
| Peloponnese                                                                                     | 20 (5.3)   | 28 (3.9)   |                       |
| Islands (Aegean and Ionian islands, Crete)                                                      | 13 (3.4)   | 26 (3.7)   |                       |
| Thessaly and Central Greece                                                                     | 14 (3.7)   | 34 (4.8)   |                       |
| Epirus                                                                                          | 215 (56.9) | 397 (55.9) |                       |
| Macedonia and Thrace                                                                            | 46 (12.2)  | 85 (12.0)  | 0.857                 |
| <hr/>                                                                                           |            |            |                       |
| <b>Questions about COVID-19</b>                                                                 |            |            |                       |
| <b>Coronavirus existence, N (%)</b>                                                             |            |            |                       |
| Definitely not/probably not/do not know                                                         | 17 (4.5)   | 25 (3.5)   |                       |
| Probably yes                                                                                    | 45 (11.8)  | 90 (12.6)  |                       |
| Definitely yes                                                                                  | 318 (83.7) | 600 (83.9) | 0.694                 |
| <b>Knowledge about COVID-19, N (%)</b>                                                          |            |            |                       |
| Poor knowledge                                                                                  | 109 (28.7) | 210 (29.4) |                       |
| Moderate knowledge                                                                              | 39 (10.3)  | 106 (14.8) |                       |
| Good knowledge                                                                                  | 232 (61.1) | 399 (55.8) | 0.077                 |
| <b>Following COVID-19 measures of personal protection, N (%)</b> <sup>3,4</sup>                 |            |            |                       |
| Never/rarely/sometimes                                                                          | 25 (6.6)   | 38 (5.3)   |                       |
| Frequently                                                                                      | 85 (22.4)  | 77 (10.8)  |                       |
| Almost always/always                                                                            | 269 (71.0) | 599 (83.9) | 6.3×10 <sup>-07</sup> |
| <b>Following COVID-19 measures of public protection, N (%)</b> <sup>3,5</sup>                   |            |            |                       |
| Never/rarely/sometimes                                                                          | 15 (4.0)   | 33 (4.6)   |                       |
| Frequently                                                                                      | 59 (15.6)  | 54 (7.6)   |                       |
| Almost always/always                                                                            | 303 (80.4) | 624 (87.8) | 1.8×10 <sup>-04</sup> |
| <b>Trust to health authorities for minimizing the spread of coronavirus, N (%)</b> <sup>3</sup> |            |            |                       |
| No trust                                                                                        | 63 (16.8)  | 111 (16.2) |                       |
| Little trust                                                                                    | 75 (19.9)  | 126 (18.4) |                       |
| Some trust                                                                                      | 139 (37.0) | 316 (46.1) |                       |
| Absolute trust                                                                                  | 99 (26.3)  | 133 (19.4) | 0.015                 |
| <b>Trust to official information for the new pandemic, N (%)</b> <sup>3</sup>                   |            |            |                       |
| No trust                                                                                        | 131 (34.7) | 206 (29.5) |                       |
| Little trust                                                                                    | 73 (19.4)  | 161 (23.1) |                       |
| Some/absolute trust                                                                             | 173 (45.9) | 331 (47.4) | 0.149                 |
| <b>Trust to Government for minimizing the spread of coronavirus, N (%)</b> <sup>3</sup>         |            |            |                       |
| No trust                                                                                        | 136 (36.7) | 221 (32.5) |                       |
| Little trust                                                                                    | 67 (18.1)  | 134 (19.7) |                       |
| Some trust                                                                                      | 98 (26.4)  | 241 (35.5) |                       |
| Absolute trust                                                                                  | 70 (18.9)  | 83 (12.2)  | 0.002                 |
| <b>Seasonal flu vaccination this year, N (%)</b> <sup>3</sup>                                   |            |            |                       |
| No                                                                                              | 157 (44.0) | 299 (45.4) |                       |
| Yes                                                                                             | 200 (56.0) | 360 (54.6) | 0.670                 |
| <b>Seasonal flu vaccination last year, N (%)</b> <sup>3</sup>                                   |            |            |                       |
| No                                                                                              | 233 (61.5) | 441 (61.8) |                       |
| Yes                                                                                             | 146 (38.5) | 273 (38.2) | 0.926                 |
| <b>Capability to protect against coronavirus, N (%)</b> <sup>3</sup>                            |            |            |                       |
| No/little capability                                                                            | 26 (7.0)   | 38 (5.5)   |                       |
| Moderate capability                                                                             | 226 (60.8) | 445 (64.0) |                       |
| Absolute capability                                                                             | 120 (32.3) | 212 (30.5) | 0.452                 |
| <b>COVID-19 symptoms during last months, N (%)</b> <sup>3,6</sup>                               |            |            |                       |
| No                                                                                              | 371 (97.6) | 668 (94.0) |                       |
| Yes                                                                                             | 9 (2.4)    | 43 (6.0)   | 0.007                 |
| <b>COVID-19 tested, N (%)</b> <sup>3</sup>                                                      |            |            |                       |
| No                                                                                              | 247 (65.3) | 462 (64.9) |                       |
| Yes                                                                                             | 131 (34.7) | 250 (35.1) | 0.880                 |
| <b>Family member with COVID-19 diagnosis, N (%)</b> <sup>3</sup>                                |            |            |                       |
| No                                                                                              | 362 (95.3) | 666 (93.4) |                       |
| Yes                                                                                             | 18 (4.7)   | 47 (6.6)   | 0.217                 |

|                                                                           |            |            |                       |  |
|---------------------------------------------------------------------------|------------|------------|-----------------------|--|
| <b>Willingness to vaccinate against coronavirus, N (%)</b>                |            |            |                       |  |
| No                                                                        | 96 (25.3)  | 219 (30.6) | 1.7×10 <sup>-05</sup> |  |
| Yes                                                                       | 226 (59.5) | 323 (45.2) |                       |  |
| Don't know/Don't answer                                                   | 58 (15.3)  | 173 (24.2) |                       |  |
| <b>Willingness to vaccinate their children against coronavirus, N (%)</b> |            |            |                       |  |
| No                                                                        | 121 (31.8) | 274 (38.3) | 2.2×10 <sup>-04</sup> |  |
| Yes                                                                       | 181 (47.6) | 250 (35.0) |                       |  |
| Don't know/Don't answer                                                   | 78 (20.5)  | 191 (26.7) |                       |  |

**Abbreviations:** BMI, Body mass index; COVID-19, coronavirus disease 2019; SD, Standard deviation.

- <sup>1</sup> Men: N=365; women: N=693.
- <sup>2</sup> Men: N=316; women: N=612.
- <sup>3</sup> The responses “Do not know/Do not answer” were < 10% of the total number of responses and were not taken into account
- <sup>4</sup> COVID-19 measures of personal protection: mask use, frequent hand washing, keeping distance
- <sup>5</sup> COVID-19 measures of public protection: mask use, covering the nose / mouth when coughing or sneezing, avoiding large concentrations, staying home or informing the authorities when not feeling well
- <sup>6</sup> Fever, persistent cough, breathing difficulty, loss of smell / taste
