# Supplementary material for: Parental Hesitancy towards the Established Childhood Vaccination Programmes in the COVID-19 Era: Assessing the Drivers of a Challenging Public Health Concern
Source: MDPI journal article supplement (doi:10.3390/vaccines10050814), 2022-05-20
Supplement: s1 [file s1]

**Table S3:** Betas and 95% confidence intervals (CI) for the association between COVID-19 related variables and change in the childhood vaccine hesitancy score for the 156 participants that responded to the second questionnaire, using univariable models.

|                                                                                          | N (%)      | beta (95% CI)        | p-value |
|------------------------------------------------------------------------------------------|------------|----------------------|---------|
| <b>Coronavirus existence</b>                                                             |            |                      |         |
| Definitely not/probably not/do not know/probably yes                                     | 17 (10.9)  | Ref                  |         |
| Definitely yes                                                                           | 139 (89.1) | 4.76 (-1.00, 10.51)  | 0.11    |
| <b>Knowledge about COVID-19</b>                                                          |            |                      |         |
| Poor knowledge                                                                           | 33 (21.2)  | Ref                  |         |
| Moderate knowledge                                                                       | 15 (9.6)   | -2.28 (-9.33, 4.76)  |         |
| Absolute knowledge                                                                       | 108 (69.2) | -1.28 (-5.78, 3.22)  | 0.78    |
| <b>Following COVID-19 measures of personal protection <sup>1</sup></b>                   |            |                      |         |
| Never/rarely/sometimes/frequently                                                        | 30 (19.2)  | Ref                  |         |
| Almost always/always                                                                     | 126 (80.8) | 0.09 (-4.50, 4.67)   | 0.97    |
| <b>Following COVID-19 measures of public protection <sup>2</sup></b>                     |            |                      |         |
| Never/rarely/sometimes/frequently                                                        | 20 (12.8)  | Ref                  |         |
| Almost always/always                                                                     | 136 (87.2) | -0.37 (-5.78, 5.04)  | 0.89    |
| <b>Trust to health authorities for minimizing the spread of coronavirus <sup>3</sup></b> |            |                      |         |
| No trust                                                                                 | 10 (6.5)   | Ref                  |         |
| Little trust                                                                             | 18 (11.6)  | 2.89 (-5.98, 11.75)  |         |
| Some trust                                                                               | 85 (54.8)  | -0.33 (-7.85, 7.18)  |         |
| Absolute trust                                                                           | 42 (27.1)  | -1.95 (-9.86, 5.96)  | 0.51    |
| <b>Trust to official information for the new pandemic</b>                                |            |                      |         |
| No trust                                                                                 | 29 (18.6)  | Ref                  |         |
| Little trust                                                                             | 31 (19.9)  | -1.68 (-7.51, 4.14)  |         |
| Some/absolute trust                                                                      | 96 (61.5)  | -3.11 (-7.88, 1.67)  | 0.42    |
| <b>Trust to Government for minimizing the spread of coronavirus <sup>3</sup></b>         |            |                      |         |
| No trust                                                                                 | 26 (17.3)  | Ref                  |         |
| Little trust                                                                             | 31 (20.7)  | -4.29 (-10.29, 1.71) |         |
| Some trust                                                                               | 66 (44)    | -5.07 (-10.29, 0.15) |         |
| Absolute trust                                                                           | 27 (18)    | -4.62 (-10.82, 1.58) | 0.28    |
| <b>Seasonal flu vaccination this year <sup>3</sup></b>                                   |            |                      |         |

|                                                                                 |            |                      |      |
|---------------------------------------------------------------------------------|------------|----------------------|------|
| No                                                                              | 70 (48.6)  | Ref                  |      |
| Yes                                                                             | 74 (51.4)  | 1.36 (-2.42, 5.15)   | 0.48 |
| <b>Seasonal flu vaccination last year <sup>3</sup></b>                          |            |                      |      |
| No                                                                              | 111 (71.6) | Ref                  |      |
| Yes                                                                             | 44 (28.4)  | 1.92 (-2.10, 5.95)   | 0.35 |
| <b>Capability to protect against coronavirus</b>                                |            |                      |      |
| No/little capability                                                            | 12 (7.7)   | Ref                  |      |
| Moderate capability                                                             | 100 (64.1) | -3.47 (-10.28, 3.35) |      |
| Absolute capability                                                             | 44 (28.2)  | 0.83 (-6.43, 8.10)   | 0.09 |
| <b>COVID-19 symptoms during last months <sup>3, 4</sup></b>                     |            |                      |      |
| No                                                                              | 147 (95.4) | Ref                  |      |
| Yes                                                                             | 7 (4.6)    | 5.81 (-2.89, 14.50)  | 0.19 |
| <b>COVID-19 tested</b>                                                          |            |                      |      |
| No                                                                              | 93 (59.6)  | Ref                  |      |
| Yes                                                                             | 63 (40.4)  | 0.21 (-3.48, 3.89)   | 0.91 |
| <b>Family member with COVID-19 diagnosis</b>                                    |            |                      |      |
| No                                                                              | 146 (93.6) | Ref                  |      |
| Yes                                                                             | 10 (6.4)   | 4.08 (-3.27, 11.44)  | 0.27 |
| <b>Willingness to vaccinate against coronavirus <sup>3</sup></b>                |            |                      |      |
| No                                                                              | 26 (21.3)  | Ref                  |      |
| Yes                                                                             | 96 (78.7)  | 0.82 (-3.96, 5.59)   | 0.74 |
| <b>Willingness to vaccinate their children against coronavirus <sup>3</sup></b> |            |                      |      |
| No                                                                              | 40 (35.1)  | Ref                  |      |
| Yes                                                                             | 74 (64.9)  | 0.77 (-3.71, 5.25)   | 0.73 |

**Abbreviations:** COVID-19, coronavirus disease 2019; Ref, reference category.

<sup>1</sup> COVID-19 measures of personal protection: mask use, frequent hand washing, keeping distance

<sup>2</sup> COVID-19 measures of public protection: mask use, covering the nose/mouth when coughing or sneezing, avoiding large concentrations, staying home or informing the authorities when not feeling well

<sup>3</sup> The responses “Do not know/Do not answer” were not taken into account

<sup>4</sup> Fever, persistent cough, breathing difficulty, loss of smell/taste
